# Supplementary material for: Knowledge, Concerns, and Behaviors of Individuals During the First Week of the Coronavirus Disease 2019 Pandemic in Italy
Source: PubMed Central journal article supplement (PMC7382000; doi:10.1001/jamanetworkopen.2020.15821), 2020-07-24

## Supplementary Online Content

Pagnini F, Bonanomi A, Tagliabue S, et al. Knowledge, concerns, and behaviors of individuals during the first week of the coronavirus disease 2019 pandemic in Italy. *JAMA Netw Open*. 2020;3(7):e2015821. doi:10.1001/jamanetworkopen.2020.15821

**eTable 1.** Frequency Distributions of the Items Measuring Worries About COVID-19

**eTable 2.** Descriptive Statistics and Analysis of Variance of Each Measure for Sex and Age

**eFigure.** Sample Distribution Across Zones

This supplementary material has been provided by the authors to give readers additional information about their work.

**eTable 1.** Frequency Distributions of the Items Measuring Worries About COVID-19

| Items measuring worries about COVID-19                                                                                                                                                                       | 1      | 2      | 3      | 4      | 5      | 6      | 7      | N    |
|--------------------------------------------------------------------------------------------------------------------------------------------------------------------------------------------------------------|--------|--------|--------|--------|--------|--------|--------|------|
| 1) How worried are you about the Coronavirus-related situation? (from 1, not worried at all, to 7, extremely worried)                                                                                        | 23.32% | 17.17% | 20.11% | 23.11% | 12.90% | 2.61%  | 0.78%  | 2830 |
| 2) What do you think are the odds of catching the Coronavirus? (from 1, highly unlikely, to 7, highly likely)                                                                                                | 3.15%  | 14.46% | 22.41% | 28.31% | 20.33% | 8.27%  | 3.08%  | 2829 |
| 3) As for his social behavior. in the next few days... (from 1, I will try not to meet anyone. to 7, I will not limit contacts with other people)                                                            | 2.01%  | 5.73%  | 13.08% | 23.44% | 20.43% | 18.70% | 16.61% | 2829 |
| 4) In the next few days, will you physically distance yourself from the people you will meet? (from 1, absolutely yes, to 7, absolutely not)                                                                 | 2.09%  | 5.24%  | 11.72% | 18.05% | 21.84% | 20.78% | 20.28% | 2825 |
| 5) Does seeing people around you worried about the virus increase your concern? (from 1, absolutely yes, to 7, absolutely not)                                                                               | 4.71%  | 7.50%  | 15.50% | 15.04% | 16.42% | 17.45% | 23.36% | 2825 |
| 6) Does hearing about the virus in a worrisome way increase your perception of risk? (from 1, absolutely yes, to 7, absolutely not)                                                                          | 8.28%  | 11.68% | 19.33% | 11.79% | 14.19% | 15.36% | 19.36% | 2825 |
| 7) Does meeting people who experience a physical discomfort such as cough. sneezing. or similar. make you feel in danger? (from 1, absolutely yes, to 7, absolutely not)                                     | 4.67%  | 8.85%  | 18.65% | 19.26% | 18.69% | 17.06% | 12.81% | 2825 |
| 8) Does seeing "panic scenes" in people around you (e.g.. spasmodic search for disinfectants, depleting supermarkets. etc.) increase your perception of risk? (from 1, absolutely yes, to 7, absolutely not) | 4.53%  | 6.83%  | 14.86% | 12.27% | 15.99% | 19.03% | 26.49% | 2827 |

**eTable 2.** Descriptive Statistics and Analysis of Variance of Each Measure for Sex and Age

| Variables                  | min | max | N    | gender |       | <i>p</i> | <i>eta</i> | age   |       |       | <i>p</i> | Effect size |
|----------------------------|-----|-----|------|--------|-------|----------|------------|-------|-------|-------|----------|-------------|
|                            |     |     |      | M      | F     |          |            | 18-24 | 25-40 | >40   |          |             |
| Physical health            | 13  | 69  | 2619 | 54.54  | 54.11 | 0.10     | 0.032      | 54.87 | 54.53 | 52.22 | <0.001   | 0.184       |
| Mental health              | 10  | 70  | 2619 | 49.18  | 47.46 | <0.001   | 0.069      | 46.71 | 47.37 | 51.14 | <0.001   | 0.168       |
| Optimism                   | 1   | 5   | 2447 | 2.64   | 2.75  | 0.003    | 0.060      | 2.85  | 2.75  | 2.42  | <0.001   | 0.209       |
| Need for cognitive closure | 1   | 6   | 2437 | 3.71   | 3.86  | <0.001   | 0.077      | 3.90  | 3.78  | 3.70  | <0.001   | 0.102       |
| Internal locus of control  | 1   | 6   | 2411 | 3.89   | 3.69  | <0.001   | 0.093      | 3.74  | 3.74  | 3.71  | 0.79     | 0.014       |
| Agreeableness              | 1   | 5   | 2428 | 3.22   | 3.18  | 0.32     | 0.020      | 3.09  | 3.18  | 3.41  | <0.001   | 0.150       |
| Conscientiousness          | 1   | 5   | 2428 | 3.60   | 3.72  | 0.002    | 0.062      | 3.56  | 3.72  | 3.99  | <0.001   | 0.209       |
| Emotional Stability        | 1   | 5   | 2428 | 3.24   | 2.88  | <0.001   | 0.149      | 2.83  | 2.98  | 3.26  | <0.001   | 0.165       |
| Extroversion               | 1   | 5   | 2428 | 3.16   | 3.25  | 0.03     | 0.042      | 3.21  | 3.28  | 3.20  | 0.25     | 0.034       |
| Openness                   | 1   | 5   | 2428 | 3.70   | 3.63  | 0.13     | 0.031      | 3.61  | 3.72  | 3.65  | 0.05     | 0.050       |
| epidemic-related worries   | 1   | 7   | 2830 | 2.57   | 3.08  | <0.001   | 0.146      | 2.95  | 2.97  | 2.99  | 0.80     | 0.012       |
| perceived susceptibility   | 1   | 7   | 2829 | 3.60   | 3.93  | <0.001   | 0.100      | 3.95  | 3.96  | 3.49  | <0.001   | 0.140       |
| preventive behaviors       | 1   | 7   | 2829 | 2.99   | 3.18  | 0.003    | 0.057      | 3.06  | 3.22  | 3.22  | 0.006    | 0.060       |
| social appraisal           | 1   | 7   | 2828 | 2.95   | 3.52  | <0.001   | 0.160      | 3.60  | 3.32  | 2.97  | <0.001   | 0.164       |

**eFigure.** Sample Distribution Across Zones

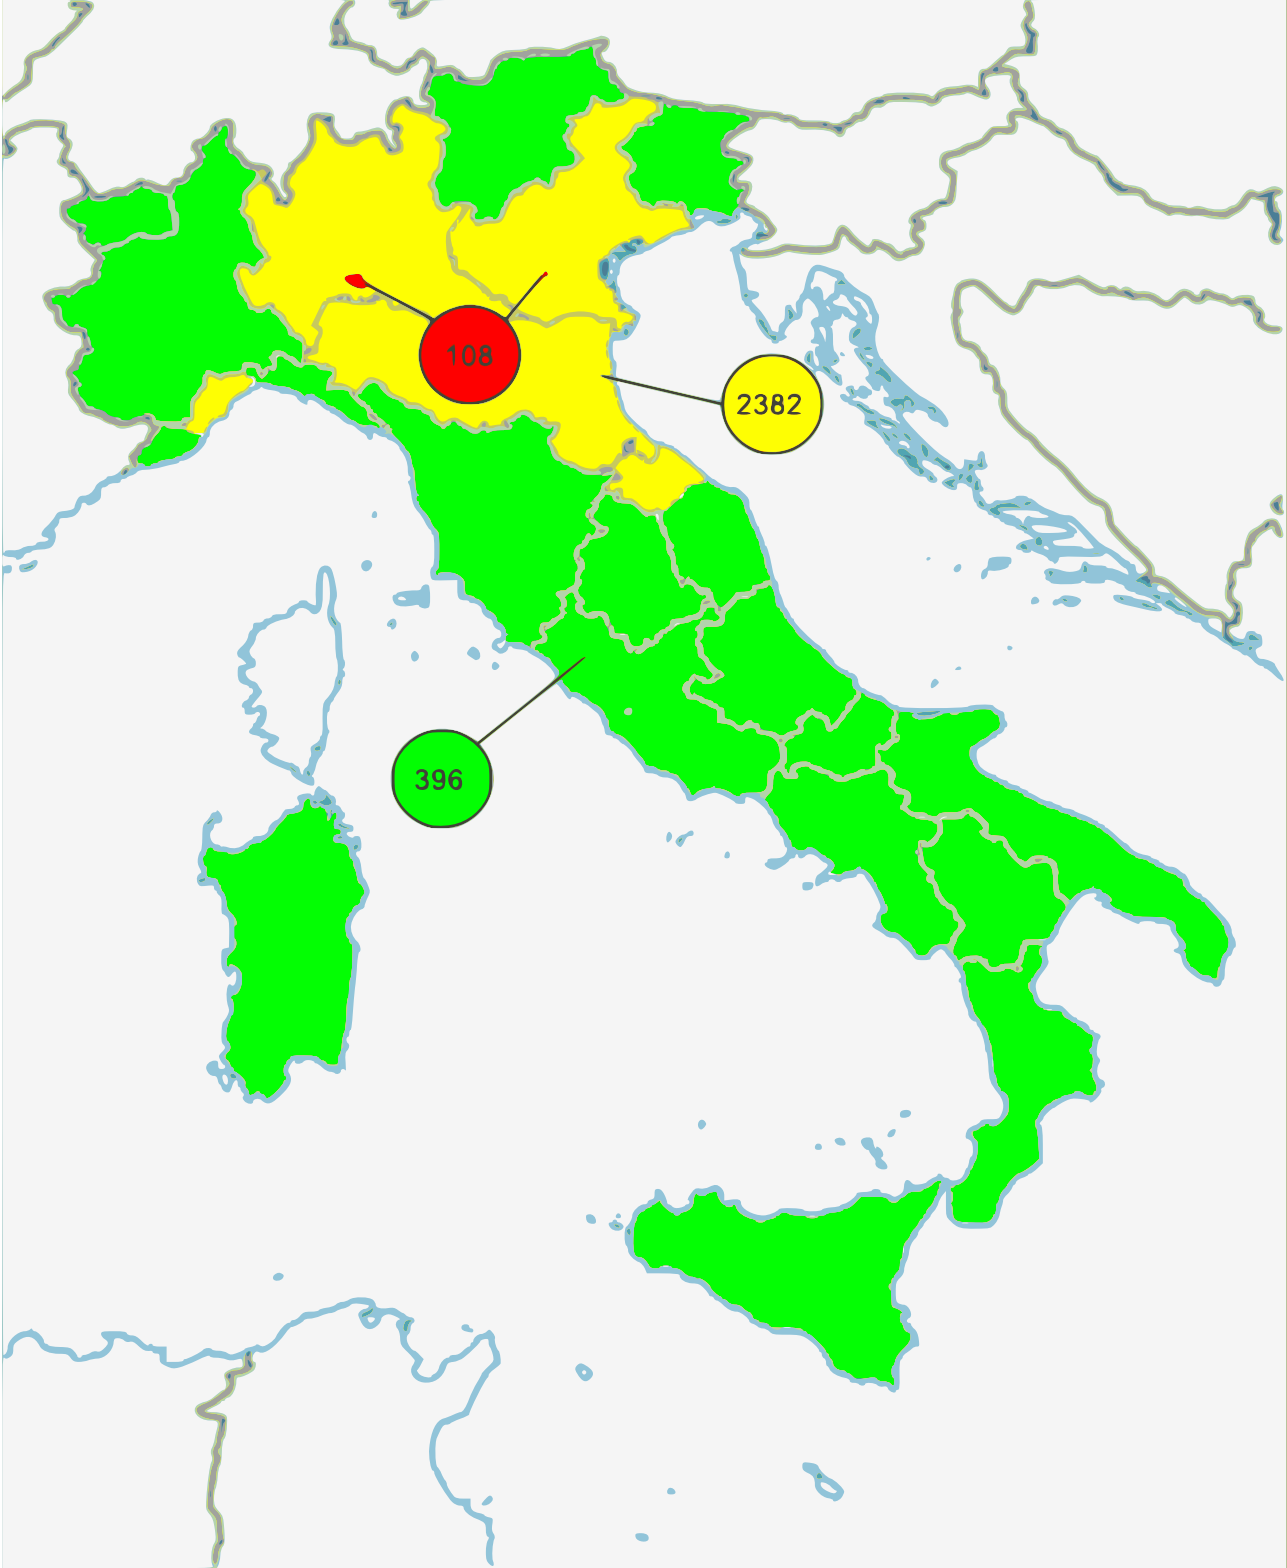

Supplement: jamanetwopen-3-e2015821-s001.pdf [file jamanetwopen-3-e2015821-s001.pdf]
